# Supplementary material
Source: PubMed Central journal article supplement (PMC10012042)
Supplement: jamapediatr-e230053-s001.pdf [file jamapediatr-e230053-s001.pdf]

## Supplemental Online Content

Wu H, Yang Y, Jia J, et al. Maternal preconception hepatitis B virus infection and risk of congenital heart diseases in offspring among Chinese women aged 20 to 49 years. *JAMA Pediatr*. Published online March 13, 2023. doi:10.1001/jamapediatrics.2023.0053

**eTable 1.** Classification of Hepatitis B Virus Infection Status

**eTable 2.** Definition and Classification of Covariates

**eTable 3.** Baseline Characteristics of Female Participants in the Cohort Before and After Propensity Score Matching

**eTable 4.** Detailed Information on Previous Studies

This supplementary material has been provided by the authors to give readers additional information about their work.

**eTable 1.** Classification of Hepatitis B Virus Infection Status

Abbreviations: HBsAg, hepatitis B surface antigen; HBsAb, hepatitis B surface antibody; HBeAg, hepatitis B envelop antigen; HBeAb, hepatitis B envelop antibody; HBcAb, hepatitis B core antibody; HBV, hepatitis B virus; +, positive; -, negative.

| Group              | Hepatitis B serological markers |       |       |       |       |
|--------------------|---------------------------------|-------|-------|-------|-------|
|                    | HBsAg                           | HBsAb | HBeAg | HBeAb | HBcAb |
| Uninfected         | -                               | -     | -     | -     | -     |
|                    | -                               | +     | -     | -     | -     |
| Previous infection | -                               | -     | -     | +     | -     |
|                    | -                               | -     | -     | +     | +     |
|                    | -                               | -     | -     | -     | +     |
|                    | -                               | +     | -     | +     | -     |
|                    | -                               | +     | -     | +     | +     |
|                    | -                               | +     | -     | -     | +     |
| New HBV infection  | +                               | -     | -     | -     | -     |
|                    | +                               | -     | -     | +     | -     |
|                    | +                               | -     | -     | -     | +     |
|                    | +                               | -     | -     | +     | +     |
|                    | +                               | -     | +     | -     | -     |
|                    | +                               | -     | +     | -     | +     |
|                    | +                               | +     | +     | +     | +     |
|                    | +                               | +     | -     | +     | +     |
|                    | +                               | +     | +     | -     | +     |
|                    | +                               | +     | +     | +     | -     |
|                    | +                               | +     | -     | -     | +     |
|                    | +                               | +     | -     | +     | -     |
|                    | +                               | +     | +     | -     | -     |
|                    | +                               | +     | -     | -     | -     |

**eTable 2. Definition and Classification of Covariates**

| Covariates                                             | Definition                                                                                                                                                                                                                                    |
|--------------------------------------------------------|-----------------------------------------------------------------------------------------------------------------------------------------------------------------------------------------------------------------------------------------------|
| Demographic and sociological covariates:               |                                                                                                                                                                                                                                               |
| Maternal age at LMP                                    | Calculated by the date of last menstrual period minus the date of birth.                                                                                                                                                                      |
| Paternal age at LMP                                    | Calculated by the date of last menstrual period minus the date of birth.                                                                                                                                                                      |
| Time interval between examination and LMP              | Calculated by the date of last menstrual period minus the date of examination (within 6 months; 6 months to 1 year)                                                                                                                           |
| Maternal nationality                                   | Self-reported (Han; minorities)                                                                                                                                                                                                               |
| Maternal drinking                                      | Self-reported (Yes; no)                                                                                                                                                                                                                       |
| Maternal smoking                                       | Self-reported (Yes; no)                                                                                                                                                                                                                       |
| Maternal preconception harmful exposure                | Exposure history of radial, the high temperature, pesticide, new decoration, paint, other organic solvents, fever, common cold, or passive smoking                                                                                            |
| History of adverse pregnancy outcome                   | Self-reported, including spontaneous abortion, induction abortion, or preterm birth (Yes; no)                                                                                                                                                 |
| Family history of congenital heart diseases (parental) | Self-reported (Yes; no)                                                                                                                                                                                                                       |
| Parity                                                 | Whether have previous live birth or stillbirth or not (Nulliparous; multiparous)                                                                                                                                                              |
| Maternal folic acid intake                             | Self-reported (Yes; no)                                                                                                                                                                                                                       |
| Early pregnancy common cold                            | Self-reported (Yes; no)                                                                                                                                                                                                                       |
| Early pregnancy passive smoking                        | Self-reported (Yes; no)                                                                                                                                                                                                                       |
| Early pregnancy medication                             | Self-reported (Treatment use; no use)                                                                                                                                                                                                         |
| Preconception clinical covariates:                     |                                                                                                                                                                                                                                               |
| BMI                                                    | Calculated by dividing the weight in kilogram by the square of the height in meter (underweight, <18.5 kg/m <sup>2</sup> ; normal, 18.5-23.9 kg/m <sup>2</sup> ; overweight, 24.0-27.9 kg/m <sup>2</sup> ; obesity, ≥28.0 kg/m <sup>2</sup> ) |
| Diabetes                                               | Self-reported or fasting plasma glucose ≥ 6.1 mmol/L (Yes; no)                                                                                                                                                                                |
| Hypertension                                           | Self-reported or systolic blood pressure ≥ 140 mm Hg, and (or) diastolic blood pressure ≥ 90 mm Hg (Yes; no)                                                                                                                                  |
| Other infection                                        | Women infected with Neisseria gonorrhoeae, Chlamydia trachomatis, Toxoplasma gondii, Cytomegalovirus, Treponema pallidum, or Rubella virus, by detecting their specific-serum antibodies. (Yes; no)                                           |
| Paternal serum HBsAg status                            | Positive; negative.                                                                                                                                                                                                                           |
| Paternal HBV infection status                          | Males were also classified into 3 groups, which were similar to the classification of maternal preconception HBV infection status. (Uninfected, previous infection, and new infection)                                                        |

Abbreviations: LMP, last menstrual period; BMI, body mass index; HBsAg, hepatitis B surface antigen; HBV, hepatitis B virus.

**eTable 3.** Baseline Characteristics of Female Participants in the Cohort Before and After Propensity Score Matching

|                                                         | Before matching               |                               |                                         | After matching                |                               |                                         |
|---------------------------------------------------------|-------------------------------|-------------------------------|-----------------------------------------|-------------------------------|-------------------------------|-----------------------------------------|
|                                                         | HBV infected<br>(n = 739,008) | Uninfected<br>(n = 6,659,877) | Standardized<br>difference <sup>a</sup> | HBV infected<br>(n = 738,945) | Uninfected<br>(n = 2,951,482) | Standardized<br>difference <sup>a</sup> |
| Maternal age at LMP, years                              |                               |                               |                                         |                               |                               |                                         |
| Mean (SD)                                               | 27.40 (4.36)                  | 26.80 (4.26)                  | 0.1376                                  | 27.40 (4.35)                  | 27.30 (4.35)                  | 0.0000                                  |
| Median (IQR)                                            | 27 (24-30)                    | 26 (24-29)                    |                                         | 27 (24-30)                    | 27 (24-30)                    |                                         |
| Time interval between preconception examination and LMP |                               |                               |                                         |                               |                               |                                         |
| Within 6 months                                         | 604,408 (81.79)               | 5,534,083 (83.10)             | -0.0339                                 | 604,375 (81.79)               | 2,415,614 (81.84)             | -0.0010                                 |
| 6 months to 1 year                                      | 134,600 (18.21)               | 1,125,794 (16.90)             | 0.0339                                  | 134,570 (18.21)               | 535,868 (18.16)               | 0.0010                                  |
| Maternal preconception BMI                              |                               |                               |                                         |                               |                               |                                         |
| Underweight, < 18.5 kg/m <sup>2</sup>                   | 118,923 (16.09)               | 862,023 (12.94)               | 0.0857                                  | 118,918 (16.09)               | 474,717 (16.08)               | -0.0004                                 |
| Normal, 18.5 to < 24.0 kg/m <sup>2</sup>                | 513,517 (69.49)               | 4,719,439 (70.86)             | -0.0299                                 | 513,516 (69.49)               | 2,053,856 (69.59)             | -0.0004                                 |
| Overweight, 24.0 to < 28.0 kg/m <sup>2</sup>            | 82,865 (11.21)                | 851,313 (12.78)               | -0.0497                                 | 82,865 (11.21)                | 3,31,700 (11.24)              | -0.0003                                 |
| Obesity, ≥ 28.0 kg/m <sup>2</sup>                       | 18,388 (2.49)                 | 202,947 (3.05)                | -0.0359                                 | 18,388 (2.49)                 | 73,370 (2.49)                 | 0.0004                                  |
| Unknown                                                 | 5,315 (0.72)                  | 24,155 (0.36)                 | 0.0422                                  | 5,258 (0.71)                  | 17,839 (0.60)                 | 0.0043                                  |
| Preconception diabetes                                  |                               |                               |                                         |                               |                               |                                         |
| No                                                      | 697,311 (94.36)               | 6,377,814 (95.76)             | -0.0610                                 | 697,292 (94.36)               | 2,785,068 (94.36)             | 0.0022                                  |
| Yes                                                     | 37,726 (5.10)                 | 250,020 (3.75)                | 0.0613                                  | 37,683 (5.10)                 | 151,398 (5.13)                | -0.0033                                 |
| Unknown                                                 | 3,971 (0.54)                  | 32,043 (0.48)                 | 0.0077                                  | 3,970 (0.54)                  | 15,016 (0.51)                 | 0.0030                                  |
| Preconception harmful exposure                          |                               |                               |                                         |                               |                               |                                         |
| No                                                      | 623,733 (84.40)               | 5,869,233 (88.13)             | -0.1027                                 | 623,729 (84.41)               | 2,495,225 (84.54)             | -0.0008                                 |
| Yes                                                     | 102,054 (13.81)               | 697,606 (10.47)               | 0.0967                                  | 102,036 (13.81)               | 406,425 (13.77)               | -0.0004                                 |
| Unknown                                                 | 13,221 (1.79)                 | 93,038 (1.40)                 | 0.0296                                  | 13,180 (1.78)                 | 49,832 (1.69)                 | 0.0032                                  |

|                                          | Before matching               |                               |                                         | After matching                |                               |                                         |
|------------------------------------------|-------------------------------|-------------------------------|-----------------------------------------|-------------------------------|-------------------------------|-----------------------------------------|
|                                          | HBV infected<br>(n = 739,008) | Uninfected<br>(n = 6,659,877) | Standardized<br>difference <sup>a</sup> | HBV infected<br>(n = 738,945) | Uninfected<br>(n = 2,951,482) | Standardized<br>difference <sup>a</sup> |
| Maternal preconception infectious status |                               |                               |                                         |                               |                               |                                         |
| No                                       | 551,211 (74.59)               | 4,819,992 (72.37)             | 0.0509                                  | 551,206 (74.59)               | 2,205,054 (74.71)             | -0.0011                                 |
| Yes                                      | 146,604 (19.84)               | 1,569,214 (23.56)             | -0.0934                                 | 146,604 (19.84)               | 586,231 (19.86)               | 0.0001                                  |
| Unknown                                  | 41,193 (5.57)                 | 270,671 (4.06)                | 0.0658                                  | 41,135 (5.57)                 | 160,197 (5.43)                | 0.0019                                  |
| Parity                                   |                               |                               |                                         |                               |                               |                                         |
| Nulliparous                              | 437,463 (59.20)               | 3,967,948 (59.58)             | -0.0078                                 | 437,428 (59.20)               | 1,747,177 (59.20)             | -0.0001                                 |
| Multiparous                              | 301,545 (40.80)               | 2,691,929 (40.42)             | 0.0078                                  | 301,517 (40.80)               | 1,204,305 (40.80)             | 0.0001                                  |

Abbreviations: LMP, last menstrual period; SD, standard deviation; IQR, interquartile range; BMI, body-mass index; HBV, hepatitis B virus.

<sup>a</sup>Standardized differences were calculated according to Austin<sup>1</sup>.

1. Austin PC. Using the Standardized Difference to Compare the Prevalence of a Binary Variable Between Two Groups in Observational Research. *Communications in Statistics - Simulation and Computation*. 2009/05/14 2009;38(6):1228-1234. doi:10.1080/03610910902859574

**eTable 4.** Detailed Information on Previous Studies

| Author<br>(Year of publication) | Geographic Region | Study Design | Sample Size | Diagnosis Method<br>of CHDs                                                                                      | Ascertainment of<br>HBV Infection             | Infection Time  | ORs/RRs (95% CIs)          |
|---------------------------------|-------------------|--------------|-------------|------------------------------------------------------------------------------------------------------------------|-----------------------------------------------|-----------------|----------------------------|
| Liang <sup>14</sup> , 2017      | China             | Case-control | 5,381       | Not stated                                                                                                       | Self-report                                   | First trimester | 1.38 (0.33-5.72)           |
| Wang <sup>16</sup> , 2022       | China             | Cohort       | 44,048      | Physical<br>examination, heart<br>auscultation,<br>electrocardiogram,<br>pulse oximetry, and<br>echocardiography | Serological<br>markers and<br>HBV-DNA testing | First trimester | 2.21 (1.66-2.95)           |
| Lai <sup>17</sup> , 2001        | China             | Case-control | 1,522       | Not stated                                                                                                       | Self-report                                   | First trimester | 1.1014 (0.4650-26,088)     |
| Guo <sup>18</sup> , 2010        | China             | Case-control | 367         | Ultrasound<br>examination                                                                                        | Antibody testing                              | First trimester | 1,448.83 (6.37-329,730.35) |

Abbreviations: CHDs, congenital heart diseases; HBV, hepatitis B virus; ORs, odds ratios; RRs, relative ratios.
