# Supplementary material
Source: PubMed Central journal article supplement (PMC10012042)
Supplement: jamapediatr-e230053-s002.pdf [file jamapediatr-e230053-s002.pdf]

## Data Sharing Statement

Wu. Maternal Preconception Hepatitis B Virus Infection and Risk of Congenital Heart Diseases in Offspring Among Chinese Women Aged 20 to 49 Years. *JAMA Pediatr.* Published March 13, 2023. doi:10.1001/jamapediatrics.2023.0053

### Data

**Data available:** No

### Additional Information

**Explanation for why data not available:** NFPCP data contains sensitive data and cannot be shared via public deposition because of information governance restrictions to protect individuals' confidentiality. Access to data for external researchers (not affiliated with National Research Institute for Family Planning) requires researchers to be physically based in the institute. Access to data is available only once approval has been obtained through the individual constituent entities controlling access to the data.
